# Supplementary material for: Trends, Predictors, and Outcomes of 30‐Day Readmission With Heart Failure After Transcatheter Aortic Valve Replacement: Insights From the US Nationwide Readmission Database
Source: PubMed Central journal article supplement — J Am Heart Assoc. 2022 Aug 5;11(16):e024890. doi: 10.1161/JAHA.121.024890 (PMC9496292; doi:10.1161/jaha.121.024890), 2022-08-05
Supplement: JAH3-11-e024890-s001.pdf [file JAH3-11-e024890-s001.pdf]

## **SUPPLEMENTAL MATERIAL**

**Table S1. ICD 10 codes used for the study**

| <b>Variables</b>                               | <b>ICD-10-codes</b>                                                                                                                                                           |
|------------------------------------------------|-------------------------------------------------------------------------------------------------------------------------------------------------------------------------------|
| <b>Transcatheter Aortic Valve Implantation</b> | 02RF3                                                                                                                                                                         |
| <b>Coronary Artery Disease</b>                 | I251, I257, I258, I259, I255                                                                                                                                                  |
| <b>Congestive heart failure</b>                | I09.9, I11.0, I13.0, I13.2, I25.5, I42.0, I42.5–I42.9, I43.x, I50.x, P29.0                                                                                                    |
| <b>Peripheral vascular Disease</b>             | I70.x, I71.x, I73.1, I73.8, I73.9, I77.1, I79.0, I79.2, K55.1, K55.8, K55.9, Z95.8, Z95.9                                                                                     |
| <b>Cerebrovascular disease</b>                 | G45.x, G46.x, H34.0, I60.x–I69.x                                                                                                                                              |
| <b>Chronic pulmonary disease</b>               | I27.8, I27.9, J40.x–J47.x, J60.x–J67.x, J68.4, J70.1, J70.3                                                                                                                   |
| <b>Diabetes Mellitus</b>                       | E10.0, E10.1, E10.6, E10.8, E10.9, E11.0, E11.1, E11.6, E11.8, E11.9, E12.0, E12.1, E12.6, E12.8, E12.9, E13.0, E13.1, E13.6, E13.8, E13.9, E14.0, E14.1, E14.6, E14.8, E14.9 |
| <b>Chronic Kidney Disease</b>                  | N18                                                                                                                                                                           |
| <b>End-Stage Renal Disease</b>                 | Z992, N186                                                                                                                                                                    |
| <b>Pulmonary circulation disorders</b>         | I26.x, I27.x, I28.0, I28.8, I28.9                                                                                                                                             |
| <b>Peripheral vascular disorders</b>           | I70.x, I71.x, I73.1, I73.8, I73.9, I77.1, I79.0, I79.2, K55.1, K55.8, K55.9, Z95.8, Z95.9                                                                                     |
| <b>Hypertension</b>                            | I10.x                                                                                                                                                                         |
| <b>Liver disease</b>                           | B18.x, I85.x, I86.4, I98.2, K70.x, K71.1, K71.3–K71.5, K71.7, K72.x–K74.x, K76.0, K76.2–K76.9, Z94.4                                                                          |
| <b>Coagulopathy</b>                            | D65–D68.x, D69.1, D69.3–D69.6                                                                                                                                                 |
| <b>Obesity</b>                                 | E66.x                                                                                                                                                                         |
| <b>Weight loss</b>                             | E40.x–E46.x, R63.4, R64                                                                                                                                                       |
| <b>Atrial fibrillation</b>                     | I48                                                                                                                                                                           |
| <b>Mitral stenosis</b>                         | I342, I1050                                                                                                                                                                   |
| <b>Prior MI</b>                                | I252                                                                                                                                                                          |
| <b>Prior CABG</b>                              | Z951                                                                                                                                                                          |
| <b>Prior Pacemaker</b>                         | Z950                                                                                                                                                                          |
| <b>Prior Stroke</b>                            | I69, Z8673                                                                                                                                                                    |
| <b>Prior PCI</b>                               | Z955                                                                                                                                                                          |

Abbreviations: ICD=International Classification of Disease, MI=Myocardial Infarction, PCI=Percutaneous coronary intervention, CABG=Coronary artery bypass graft surgery

**Table S2. Baseline Characteristics of the study population**

|                                                  | <b>Without Readmission (148,329)</b> | <b>30-Day HF Readmission (5962)</b> | <b>P value*</b> | <b>30-day non- HF readmission (13054)</b> | <b>P value†</b> | <b>P value‡</b> |
|--------------------------------------------------|--------------------------------------|-------------------------------------|-----------------|-------------------------------------------|-----------------|-----------------|
| <b>Age (median [IQR])</b>                        | 81(75-86)                            | 83(76-87)                           | <0.01           | 82(75-87)                                 | 0.06            | <0.01           |
| <b>Age Categories</b>                            |                                      |                                     | <0.01           |                                           | 0.01            | <0.01           |
| <b>&lt;=64</b>                                   | 7512(5.1)                            | 239(4.0)                            |                 | 703(5.4)                                  |                 |                 |
| <b>65-74</b>                                     | 26974(18.2)                          | 1020(17.1)                          |                 | 2279(17.5)                                |                 |                 |
| <b>75-84</b>                                     | 62842(42.4)                          | 2321(38.9)                          |                 | 5429(41.6)                                |                 |                 |
| <b>&gt;=85</b>                                   | 51001(34.4)                          | 2382(40.0)                          |                 | 4644(35.6)                                |                 |                 |
| <b>Charlson Comorbidity Index (median [IQR])</b> | 7(6-8)                               | 8(7-9)                              | <0.01           | 7(6-8)                                    | <0.01           | <0.01           |
| <b>Charlson Comorbidity Index Score &gt;8</b>    | 57915(39.0)                          | 3415(57.3)                          | <0.01           | 4850(37.2)                                | <0.01           | <0.01           |
| <b>Elective Index Admission</b>                  | 120366(81.4)                         | 4037(68.0)                          | <0.01           | 9907(76.2)                                | <0.01           | <0.01           |
| <b>Female Sex</b>                                | 67678(45.6)                          | 2766(46.4)                          | 0.25            | 6043(46.3)                                | 0.14            | 0.21            |
| <b>Primary Payer</b>                             |                                      |                                     | <0.01           |                                           | <0.01           | <0.01           |
| <b>Medicare</b>                                  | 134856(90.9)                         | 5527(92.7)                          |                 | 12006(92.0)                               |                 |                 |
| <b>Medicaid</b>                                  | 1588(1.1)                            | 52(0.9)                             |                 | 149(1.1)                                  |                 |                 |
| <b>Private Insurance</b>                         | 8613(5.8)                            | 274(4.6)                            |                 | 679(5.2)                                  |                 |                 |
| <b>Self-Pay</b>                                  | 534(0.4)                             | 22(0.4)                             |                 | 42(0.3)                                   |                 |                 |
| <b>Other<sup>  </sup></b>                        | 2561(1.7)                            | 79(1.3)                             |                 | 168(1.3)                                  |                 |                 |
| <b>Others/Missing<sup>#</sup></b>                | 177(0.1)                             | <11(0.18) <sup>§</sup>              |                 | <11(<0.08) <sup>§</sup>                   |                 |                 |
| <b>Median Quartile of Income</b>                 |                                      |                                     | 0.36            |                                           | 0.66            | 0.55            |
| <b>0-25<sup>th</sup> Percentile</b>              | 30144(20.3)                          | 1247(20.9)                          |                 | 2681(20.5)                                |                 |                 |
| <b>25 to 50<sup>th</sup> Percentile</b>          | 40254(27.1)                          | 1574(26.4)                          |                 | 3555(27.2)                                |                 |                 |
| <b>50 to 75<sup>th</sup> Percentile</b>          | 40177(27.1)                          | 1645(27.6)                          |                 | 3477(26.6)                                |                 |                 |
| <b>75 to 100<sup>th</sup> Percentile</b>         | 35869(24.2)                          | 1413(23.7)                          |                 | 3194(24.5)                                |                 |                 |
| <b>Others/Missing<sup>#</sup></b>                | 1885(1.3)                            | 84(1.4)                             |                 | 147(1.1)                                  |                 |                 |
| <b>Hospital Size</b>                             |                                      |                                     | 0.21            |                                           | 0.59            | 0.36            |
| <b>Small</b>                                     | 6699(4.5)                            | 243(4.1)                            |                 | 611(4.7)                                  |                 |                 |
| <b>Medium</b>                                    | 30564(20.6)                          | 1257(21.1)                          |                 | 2658(20.4)                                |                 |                 |
| <b>Large</b>                                     | 111066(74.9)                         | 4462(74.8)                          |                 | 9785(75.0)                                |                 |                 |

|                                                          |              |            |       |             |       |       |
|----------------------------------------------------------|--------------|------------|-------|-------------|-------|-------|
| <b>Hospital Teaching</b>                                 |              |            | 0.17  |             | 0.06  | 0.06  |
| <b>Metropolitan Non-Teaching</b>                         | 15961(10.8)  | 607(10.2)  |       | 1426(10.9)  |       |       |
| <b>Metropolitan Teaching</b>                             | 130993(88.3) | 5290(88.7) |       | 11480(87.9) |       |       |
| <b>Non-Metropolitan Hospital</b>                         | 1375(0.9)    | 65(1.1)    |       | 147(1.1)    |       |       |
| <b>Anemias</b>                                           | 6034(4.1)    | 548(9.2)   | <0.01 | 826(6.3)    | <0.01 | <0.01 |
| <b>Alcohol Use</b>                                       | 94(0.1)      | 1(0.0)     | 0.16  | 7(0.1)      | 0.67  | 0.34  |
| <b>Hypertension</b>                                      | 132235(89.1) | 5391(90.4) | <0.01 | 11311(86.6) | <0.01 | <0.01 |
| <b>Diabetes Mellitus</b>                                 | 25956(17.5)  | 929(15.6)  | <0.01 | 2188(16.8)  | 0.03  | <0.01 |
| <b>Coronary Artery Disease</b>                           | 104023(70.1) | 4141(69.5) | 0.27  | 8123(62.2)  | <0.01 | <0.01 |
| <b>Cerebrovascular Disease</b>                           | 16403(11.1)  | 543(9.1)   | <0.01 | 1819(13.9)  | <0.01 | <0.01 |
| <b>COPD</b>                                              | 42845(28.9)  | 2162(36.3) | <0.01 | 3780(29.0)  | 0.86  | <0.01 |
| <b>Pulmonary Circulation Disorder</b>                    | 28272(19.1)  | 1404(23.6) | <0.01 | 1518(11.6)  | <0.01 | <0.01 |
| <b>Obesity</b>                                           | 28406(19.2)  | 945(15.9)  | <0.01 | 1707(13.1)  | <0.01 | <0.01 |
| <b>Prior MI</b>                                          | 18723(12.6)  | 803(13.5)  | 0.05  | 1498(11.5)  | <0.01 | <0.01 |
| <b>Prior PCI</b>                                         | 29895(20.2)  | 1156(19.4) | 0.15  | 2496(19.1)  | 0.01  | 0.01  |
| <b>Prior CABG</b>                                        | 27210(18.3)  | 1123(18.8) | 0.34  | 2167(16.6)  | <0.01 | <0.01 |
| <b>Preexisting Pacemaker</b>                             | 14949(10.1)  | 1265(21.2) | <0.01 | 1992(15.3)  | <0.01 | <0.01 |
| <b>Pacemaker Implanted During Index Hospitalization</b>  | 14747(9.9)   | 831(13.9)  | <0.01 | 1368(10.5)  | 0.05  | <0.01 |
| <b>Complete Heart Block During Index Hospitalization</b> | 13648(9.2)   | 785(13.2)  | <0.01 | 1311(10.0)  | 0.01  | <0.01 |
| <b>Prior ICD</b>                                         | 3854(2.6)    | 13(0.2)    | <0.01 | 4(0.0)      | 0.11  | <0.01 |
| <b>Weight Loss</b>                                       | 4576(3.1)    | 518(8.7)   | <0.01 | 822(6.3)    | <0.01 | <0.01 |
| <b>Peripheral Vascular Disease</b>                       | 31157(21.0)  | 935(15.7)  | <0.01 | 1936(14.8)  | <0.01 | <0.01 |
| <b>Atrial Fibrillation</b>                               | 59545(40.1)  | 3562(59.7) | <0.01 | 6065(46.5)  | <0.01 | <0.01 |
| <b>Liver Disease</b>                                     | 4480(3.0)    | 259(4.3)   | <0.01 | 512(3.9)    | <0.01 | <0.01 |
| <b>Chronic Kidney Disease</b>                            | 32721(22.1)  | 2140(35.9) | <0.01 | 2723(20.9)  | <0.01 | <0.01 |

|                                                                 |             |            |       |            |       |       |
|-----------------------------------------------------------------|-------------|------------|-------|------------|-------|-------|
| <b>End-Stage Renal Disease</b>                                  | 5826(3.9)   | 402(6.7)   | <0.01 | 1159(8.9)  | <0.01 | <0.01 |
| <b>Paravalvular Regurgitation</b>                               | 613(0.4)    | 57(1.0)    | <0.01 | 57(0.4)    | 0.69  | <0.01 |
| <b>Mitral Stenosis</b>                                          | 1327(0.9)   | 84(1.4)    | <0.01 | 109(0.8)   | 0.49  | <0.01 |
| <b>Mitral Regurgitation</b>                                     | 10476(7.1)  | 522(8.8)   | <0.01 | 593(4.5)   | <0.01 | <0.01 |
| <b>Heart Failure with Reduced EF</b>                            | 18265(12.3) | 1550(26.0) | <0.01 | 1153(8.8)  | <0.01 | <0.01 |
| <b>Heart Failure with Preserved EF</b>                          | 64057(43.2) | 3383(56.7) | <0.01 | 2884(22.1) | <0.01 | <0.01 |
| <b>Length of Stay &gt; 4 days During Index Hospitalization</b>  | 51076(34.4) | 3531(59.2) | <0.01 | 5905(45.2) | <0.01 | <0.01 |
| <b>Non-Home/Facility Discharge During Index Hospitalization</b> | 54641(36.8) | 112(3363)  | <0.01 | 6141(47.0) | <0.01 | <0.01 |

Abbreviations: HF=Heart Failure, IQR=Interquartile range, MI=Myocardial Infarction, PCI=Percutaneous coronary intervention, CABG=Coronary artery bypass graft surgery, ICD=Implantable cardioverter defibrillator, HF=Heart failure, EF=ejection fraction

\* P value compares Index cases that did not get readmitted with index cases that got readmitted for HF

† P value compares Index cases that did not get readmitted with index cases that got readmitted for non-HF causes

‡ P value compares difference among the three groups: 1-Index cases that did not get readmitted 2- index cases that got readmitted for HF, 3: index cases that got readmitted for non-HF causes

§Observations <11 are not reported per HCUP guidelines

|| “Other” variable includes Worker's Compensation and other government programs.

#The missing values were recoded as “Others/Missing”

Descriptive statistics and regression model are based on weighted data.

**Table S3. Baseline Characteristics of the patients with and without HF readmissions**

| Variables                                | Crude Analysis                  |                             |                              | 1:1 Propensity Matching        |                             |                              |
|------------------------------------------|---------------------------------|-----------------------------|------------------------------|--------------------------------|-----------------------------|------------------------------|
|                                          | Without HF Readmission (12,864) | With HF Readmission (5,962) | Standardized Mean Difference | Without HF Readmission (5,962) | With HF Readmission (5,962) | Standardized Mean Difference |
| <b>Age (median [IQR])</b>                | 81(75-87)                       | 83(76-87)                   | 0.1091                       | 82(76-87)                      | 82(76-87)                   | 0.0085                       |
| <b>Age Categories</b>                    |                                 |                             |                              |                                |                             |                              |
| <b>&lt;=64</b>                           | 695(5.4)                        | 239(4.0)                    |                              | 222(3.7)                       | 239(4.0)                    |                              |
| <b>65-74</b>                             | 2263(17.6)                      | 1020(17.1)                  |                              | 949(15.9)                      | 1020(17.1)                  |                              |
| <b>75-84</b>                             | 5361(41.7)                      | 2321(38.9)                  |                              | 2490(41.8)                     | 2321(38.9)                  |                              |
| <b>&gt;=85</b>                           | 4545(35.3)                      | 2382(40.0)                  |                              | 2301(38.6)                     | 2382(40.0)                  |                              |
| <b>Elective Readmission</b>              | 910(7.1)                        | 0(0.0)                      | -0.0784                      | 0(0)                           | 0(0)                        | 0.0000                       |
| <b>Female Sex</b>                        | 5963(46.4)                      | 2766(46.4)                  | 0.0006                       | 2739(45.9)                     | 2766(46.4)                  | 0.0088                       |
| <b>Primary Payer</b>                     |                                 |                             | 0.0123                       |                                |                             | 0.0260                       |
| <b>Medicare</b>                          | 11825(91.9)                     | 5527(92.7)                  |                              | 5557(93.2)                     | 5527(92.7)                  |                              |
| <b>Medicaid</b>                          | 149(1.2)                        | 52(0.9)                     |                              | 52(0.9)                        | 52(0.9)                     |                              |
| <b>Private Insurance</b>                 | 670(5.2)                        | 274(4.6)                    |                              | 248(4.2)                       | 274(4.6)                    |                              |
| <b>Self-Pay</b>                          | 42(0.3)                         | 22(0.4)                     |                              | 22(0.4)                        | 22(0.4)                     |                              |
| <b>Other<sup>†</sup></b>                 | 167(1.3)                        | 79(1.3)                     |                              | 78(1.3)                        | 79(1.3)                     |                              |
| <b>Others/Missing<sup>‡</sup></b>        | 11(0.1)                         | <11(<0.2) *                 |                              | <11(<0.1) *                    | <11(<0.3) *                 |                              |
| <b>Median Quartile of Income</b>         |                                 |                             | 0.0219                       |                                |                             | 0.0044                       |
| <b>0-25<sup>th</sup> Percentile</b>      | 2635(20.5)                      | 1247(20.9)                  |                              | 1145(19.2)                     | 1247(20.9)                  |                              |
| <b>25 to 50<sup>th</sup> Percentile</b>  | 3497(27.2)                      | 1574(26.4)                  |                              | 1649(27.7)                     | 1574(26.4)                  |                              |
| <b>50 to 75<sup>th</sup> Percentile</b>  | 3435(26.7)                      | 1645(27.6)                  |                              | 1606(26.9)                     | 1645(27.6)                  |                              |
| <b>75 to 100<sup>th</sup> Percentile</b> | 3149(24.5)                      | 1413(23.7)                  |                              | 1483(24.9)                     | 1413(23.7)                  |                              |

|                                              |             |            |         |            |            |         |
|----------------------------------------------|-------------|------------|---------|------------|------------|---------|
| <b>Others/Missing<sup>‡</sup></b>            | 147(1.1)    | 84(1.4)    |         | 79(1.3)    | 84(1.4)    |         |
| <b>Hospital Size</b>                         |             |            | 0.0116  |            |            | -0.0098 |
| <b>Small</b>                                 | 605(4.7)    | 243(4.1)   |         | 262(4.4)   | 243(4.1)   |         |
| <b>Medium</b>                                | 2631(20.5)  | 1257(21.1) |         | 1188(19.9) | 1257(21.1) |         |
| <b>Large</b>                                 | 9628(74.8)  | 4462(74.8) |         | 4512(75.7) | 4462(74.8) |         |
| <b>Hospital Teaching</b>                     |             |            | 0.0189  |            |            | -0.0351 |
| <b>Metropolitan Non-Teaching</b>             | 1396(10.9)  | 607(10.2)  |         | 549(9.2)   | 607(10.2)  |         |
| <b>Metropolitan Teaching</b>                 | 11321(88.0) | 5290(88.7) |         | 5338(89.5) | 5290(88.7) |         |
| <b>Non-Metropolitan Hospital</b>             | 147(1.1)    | 65(1.1)    |         | 75(1.3)    | 65(1.1)    |         |
| <b>Anemias</b>                               | 816(6.3)    | 548(9.2)   | 0.0989  | 537(9.0)   | 548(9.2)   | 0.0065  |
| <b>Alcohol Use</b>                           | <11(<0.05)  | <11(<0.2)  | -0.0207 | <11(<0.2)  | <11(<0.2)  | -0.0246 |
| <b>Hypertension</b>                          | 11138(86.6) | 5391(90.4) | 0.1303  | 5397(90.5) | 5391(90.4) | -0.0036 |
| <b>Diabetes Mellitus</b>                     | 2157(16.8)  | 929(15.6)  | -0.0328 | 946(15.9)  | 929(15.6)  | -0.0078 |
| <b>Coronary Artery Disease</b>               | 7989(62.1)  | 4141(69.5) | 0.1597  | 4075(68.3) | 4141(69.5) | 0.0242  |
| <b>Cerebrovascular Disease</b>               | 1799(14.0)  | 543(9.1)   | -0.1696 | 558(9.4)   | 543(9.1)   | -0.0089 |
| <b>Chronic Obstructive Pulmonary Disease</b> | 3710(28.8)  | 2162(36.3) | 0.1544  | 2160(36.2) | 2162(36.3) | 0.0007  |
| <b>Pulmonary Circulation Disorder</b>        | 1471(11.4)  | 1404(23.6) | 0.2855  | 1175(19.7) | 1404(23.6) | 0.0905  |
| <b>Obesity</b>                               | 1676(13.0)  | 945(15.9)  | 0.0773  | 921(15.4)  | 945(15.9)  | 0.0112  |
| <b>Prior MI</b>                              | 1473(11.4)  | 803(13.5)  | 0.0592  | 822(13.8)  | 803(13.5)  | -0.0093 |
| <b>Prior PCI</b>                             | 2461(19.1)  | 1156(19.4) | 0.0064  | 1171(19.6) | 1156(19.4) | -0.0066 |
| <b>Prior CABG</b>                            | 2125(16.5)  | 1123(18.8) | 0.0593  | 1139(19.1) | 1123(18.8) | -0.0067 |
| <b>Preexisting Pacemaker</b>                 | 1959(15.2)  | 1265(21.2) | 0.1463  | 1170(19.6) | 1265(21.2) | 0.0387  |

|                                    |            |            |         |            |            |         |
|------------------------------------|------------|------------|---------|------------|------------|---------|
| <b>Prior ICD</b>                   | 364(2.8)   | 296(5.0)   | 0.0981  | 295(5.0)   | 296(5.0)   | 0.0001  |
| <b>Smoking</b>                     | 474(3.7)   | 196(3.3)   | -0.0220 | 186(3.1)   | 196(3.3)   | 0.0097  |
| <b>Electrolyte Abnormalities</b>   | 4019(31.2) | 2228(37.4) | 0.1267  | 2236(37.5) | 2228(37.4) | -0.0028 |
| <b>Lymphoma</b>                    | 110(0.9)   | 45(0.8)    | -0.0114 | 48(0.8)    | 45(0.8)    | -0.0060 |
| <b>Solid Organ Tumors</b>          | 535(4.2)   | 145(2.4)   | -0.1123 | 166(2.8)   | 145(2.4)   | -0.0232 |
| <b>Weight Loss</b>                 | 801(6.2)   | 518(8.7)   | 0.0872  | 486(8.1)   | 518(8.7)   | 0.0192  |
| <b>Peripheral Vascular Disease</b> | 1893(14.7) | 935(15.7)  | 0.0268  | 903(15.2)  | 935(15.7)  | 0.0146  |
| <b>Atrial Fibrillation</b>         | 5947(46.2) | 3562(59.7) | 0.2757  | 3556(59.6) | 3562(59.7) | 0.0021  |
| <b>Liver Disease</b>               | 508(3.9)   | 259(4.3)   | 0.0197  | 236(4.0)   | 259(4.3)   | 0.0188  |
| <b>Chronic Kidney Disease</b>      | 2642(20.5) | 2140(35.9) | 0.3201  | 2015(33.8) | 2140(35.9) | 0.0437  |
| <b>End-Stage Renal Disease</b>     | 1149(8.9)  | 402(6.7)   | -0.0877 | 460(7.7)   | 402(6.7)   | -0.0390 |
| <b>Paravalvular Regurgitation</b>  | 53(0.4)    | 57(1.0)    | 0.0561  | 40(0.7)    | 57(1.0)    | 0.0299  |
| <b>Mitral Stenosis</b>             | 100(0.8)   | 84(1.4)    | 0.0537  | 85(1.4)    | 84(1.4)    | -0.0007 |
| <b>Mitral Regurgitation</b>        | 563(4.4)   | 522(8.8)   | 0.1548  | 418(7.0)   | 522(8.8)   | 0.0616  |

Abbreviations: IQR=Interquartile range, MI=Myocardial Infarction, PCI=Percutaneous coronary intervention, CABG=Coronary artery bypass graft surgery, ICD=Implantable cardioverter defibrillator, HF=Heart failure, EF=ejection fraction

\*Observations <11 are not reported per HCUP guidelines

† “Other” variable includes Worker's Compensation and other government programs.

‡The missing values were recoded as “Others/Missing”

Descriptive statistics and regression model are based on weighted data.



**Table S4. Baseline Characteristics of the patients of low volume (<50 TAVRs), medium volume (51-100 TAVRs) and high volume (>100 TAVRs) annual discharge hospitals in 2018**

| <b>Variables</b>                          | <b>Low volume (3371)</b> | <b>Medium Volume (9653)</b> | <b>High Volume (21716)</b> | <b>P value</b> |
|-------------------------------------------|--------------------------|-----------------------------|----------------------------|----------------|
| Age (median [IQR])                        | 81(75-86)                | 81(75-86)                   | 81(75-86)                  | 0.36           |
| Age Categories                            |                          |                             |                            | 0.01           |
| <=64                                      | 138(4.1)                 | 502(5.2)                    | 1149(5.3)                  |                |
| 65-74                                     | 667(19.8)                | 1788(18.5)                  | 4033(18.6)                 |                |
| 75-84                                     | 1464(43.4)               | 4241(43.9)                  | 9255(42.6)                 |                |
| >=85                                      | 1102(32.7)               | 3122(32.3)                  | 7279(33.5)                 |                |
| Charlson Comorbidity Index (median [IQR]) | 7(6-8)                   | 7(6-8)                      | 7(6-8)                     | <0.01          |
| Charlson Index Score >8                   | 1156(34.3)               | 3441(35.6)                  | 8320(38.3)                 | <0.01          |
| Elective Index Admission                  | 2923(86.8)               | 8254(85.6)                  | 17026(78.4)                | <0.01          |
| Female Sex                                | 1591(47.2)               | 4392(45.5)                  | 9923(45.7)                 | 0.21           |
| Primary Payer                             |                          |                             |                            | <0.01          |
| Medicare                                  | 3101(92.0)               | 8738(90.5)                  | 19512(89.9)                |                |
| Medicaid                                  | 70(2.1)                  | 105(1.1)                    | 252(1.2)                   |                |
| Private Insurance                         | 123(3.6)                 | 531(5.5)                    | 1524(7.0)                  |                |
| Self-Pay                                  | 8(0.2)                   | 31(0.3)                     | 74(0.3)                    |                |
| Other <sup>†</sup>                        | 67(2.0)                  | 246(2.5)                    | 324(1.5)                   |                |
| Others/Missing <sup>‡</sup>               | <11(<0.3) *              | <11(<0.01) *                | 30(0.1)                    |                |
| Median Quartile of Income                 |                          |                             |                            | <0.01          |
| 0-25 <sup>th</sup> Percentile             | 852(25.3)                | 2204(22.8)                  | 3542(16.3)                 |                |
| 25 to 50 <sup>th</sup> Percentile         | 1011(30.0)               | 2856(29.6)                  | 5109(23.5)                 |                |
| 50 to 75 <sup>th</sup> Percentile         | 909(27.0)                | 2565(26.6)                  | 6013(27.7)                 |                |
| 75 to 100 <sup>th</sup> Percentile        | 550(16.3)                | 1891(19.6)                  | 6807(31.3)                 |                |
| Others/Missing <sup>‡</sup>               | 49(1.4)                  | 137(1.4)                    | 245(1.1)                   |                |
| Hospital Size                             |                          |                             |                            | <0.01          |
| Small                                     | 339(10.1)                | 925(9.6)                    | 148(0.7)                   |                |
| Medium                                    | 1310(38.9)               | 1852(19.2)                  | 4474(20.6)                 |                |
| Large                                     | 1722(51.1)               | 6876(71.2)                  | 17094(78.7)                |                |
| Hospital Teaching                         |                          |                             |                            | <0.01          |
| Metropolitan Non-Teaching                 | 731(21.7)                | 1603(16.6)                  | 1260(5.8)                  |                |
| Metropolitan Teaching                     | 2614(77.5)               | 7878(81.6)                  | 20456(94.2)                |                |
| Non-Metropolitan                          | 26(0.8)                  | 172(1.8)                    | 0(0.0)                     |                |
| Anemias                                   | 139(4.1)                 | 413(4.3)                    | 963(4.4)                   | 0.64           |
| Alcohol Use                               | <11(<0.3)*               | <11(<0.1)*                  | <11(<0.1)*                 | 0.48           |
| Hypertension                              | 3056(90.7)               | 8650(89.6)                  | 19544(90)                  | 0.21           |
| Diabetes Mellitus                         | 543(16.1)                | 1395(14.5)                  | 3086(14.2)                 | 0.01           |
| Coronary Artery Disease                   | 2287(67.8)               | 6467(67.0)                  | 14928(68.7)                | 0.01           |

|                                                |            |             |             |       |
|------------------------------------------------|------------|-------------|-------------|-------|
| Cerebrovascular Disease                        | 394(11.7)  | 990(10.3)   | 2352(10.8)  | 0.06  |
| COPD                                           | 956(28.4)  | 2754(28.5)  | 5888(27.1)  | 0.02  |
| Pulmonary Circulation Disorder                 | 545(16.2)  | 1536(15.9)  | 3748(17.3)  | 0.01  |
| Obesity                                        | 675(20.0)  | 1882(19.5)  | 4137(19.1)  | 0.33  |
| Prior MI                                       | 428(12.7)  | 1168(12.1)  | 2709(12.5)  | 0.55  |
| Prior PCI                                      | 752(22.3)  | 1867(19.3)  | 4252(19.6)  | <0.01 |
| Prior CABG                                     | 631(18.7)  | 1638(17.0)  | 3351(15.4)  | <0.01 |
| Prior Pacemaker                                | 355(10.5)  | 1017(10.5)  | 2295(10.6)  | 0.91  |
| Prior ICD                                      | 85(2.5)    | 234(2.4)    | 531(2.4)    | 0.95  |
| Electrolyte Abnormalities                      | 526(15.6)  | 1500(15.5)  | 3645(16.8)  | 0.01  |
| Lymphoma                                       | 25(0.7)    | 59(0.6)     | 179(0.8)    | 0.13  |
| Solid Organ Tumors                             | 75(2.2)    | 252(2.6)    | 589(2.7)    | 0.26  |
| Weight Loss                                    | 112(3.3)   | 288(3.0)    | 752(3.5)    | 0.09  |
| Peripheral Vascular Disease                    | 595(17.7)  | 1735(18.0)  | 4069(18.7)  | 0.13  |
| Atrial Fibrillation                            | 1370(40.6) | 3840(39.8)  | 8932(41.1)  | 0.08  |
| Weight Loss                                    | 112(3.3)   | 288(3.0)    | 752(3.5)    | 0.09  |
| Peripheral Vascular Disease                    | 595(17.7)  | 1735(18.0)  | 4069(18.7)  | 0.13  |
| Liver Disease                                  | 88(2.6)    | 309(3.2)    | 761(3.5)    | 0.02  |
| Chronic Kidney                                 | 648(19.2)  | 2008(20.8)  | 4926(22.7)  | <0.01 |
| End-Stage Renal                                | 166(4.9)   | 454(4.7)    | 939(4.3)    | 0.14  |
| Paravalvular Regurgitation                     | 16(0.5)    | 35(0.4)     | 93(0.4)     | 0.61  |
| Mitral Stenosis                                | 28(0.8)    | 89(0.9)     | 229(1.1)    | 0.33  |
| Mitral Regurgitation                           | 221(6.6)   | 586(6.1)    | 1615(7.4)   | <0.01 |
| Heart Failure with Reduced EF                  | 431(12.8)  | 1169(12.1)  | 2591(11.9)  | 0.36  |
| Heart Failure with Preserved EF                | 1345(39.9) | 4039(41.8)  | 9805(45.2)  | <0.01 |
| Length of Stay During Index Hospitalization    | 877(26.0)  | 2538(26.3)  | 6615(30.5)  | <0.01 |
| Routine Home Discharge (Index Admission)       | 2372(70.4) | 6868(71.1)  | 13656(62.9) | <0.01 |
| Non- Home/Facility Discharge (Index Admission) | 999(29.6)  | 2,785(17.6) | 8060(37.1)  |       |

Abbreviations: IQR=Interquartile range, MI=Myocardial Infarction, PCI=Percutaneous coronary intervention, CABG=Coronary artery bypass graft surgery, ICD=Implantable cardioverter defibrillator, HF=Heart failure, EF=ejection fraction

\*Observations <11 are not reported per HCUP guidelines

† “Other” variable includes Worker's Compensation and other government programs.

‡The missing values were recoded as “Others/Missing”

Descriptive statistics are based on non-weighted data

**Table S5. Adjusted odds for all-cause readmissions, HF readmissions, all-cause readmission mortality and HF readmission mortality for High Volume (>100 TAVRs) and Medium Volume Centers (50-100 TAVRs) compared with Low Volume Hospitals (<50 TAVRs)**

| <b>Variable</b>                | <b>All-Cause Readmissions</b> | <b>HF Readmission Mortality</b> | <b>All-Cause Readmission Mortality</b> | <b>HF Readmission Mortality</b> |
|--------------------------------|-------------------------------|---------------------------------|----------------------------------------|---------------------------------|
| <b>Medium-Volume Hospitals</b> | 1.04(0.92-1.19)               | 0.94(0.76-1.18)                 | 1.37(0.64-2.90)                        | 1.22(0.38-3.87)                 |
| <b>High-Volume Hospitals</b>   | 0.97(0.86-1.10)               | 0.83(0.67-1.03)                 | 1.56(0.77-3.21)                        | 1.60(0.54-4.78)                 |

Regression model is based on non-weighted data

**Figure S1. Co-Variate Balance Before and After Propensity Matching for patients with and without HF**

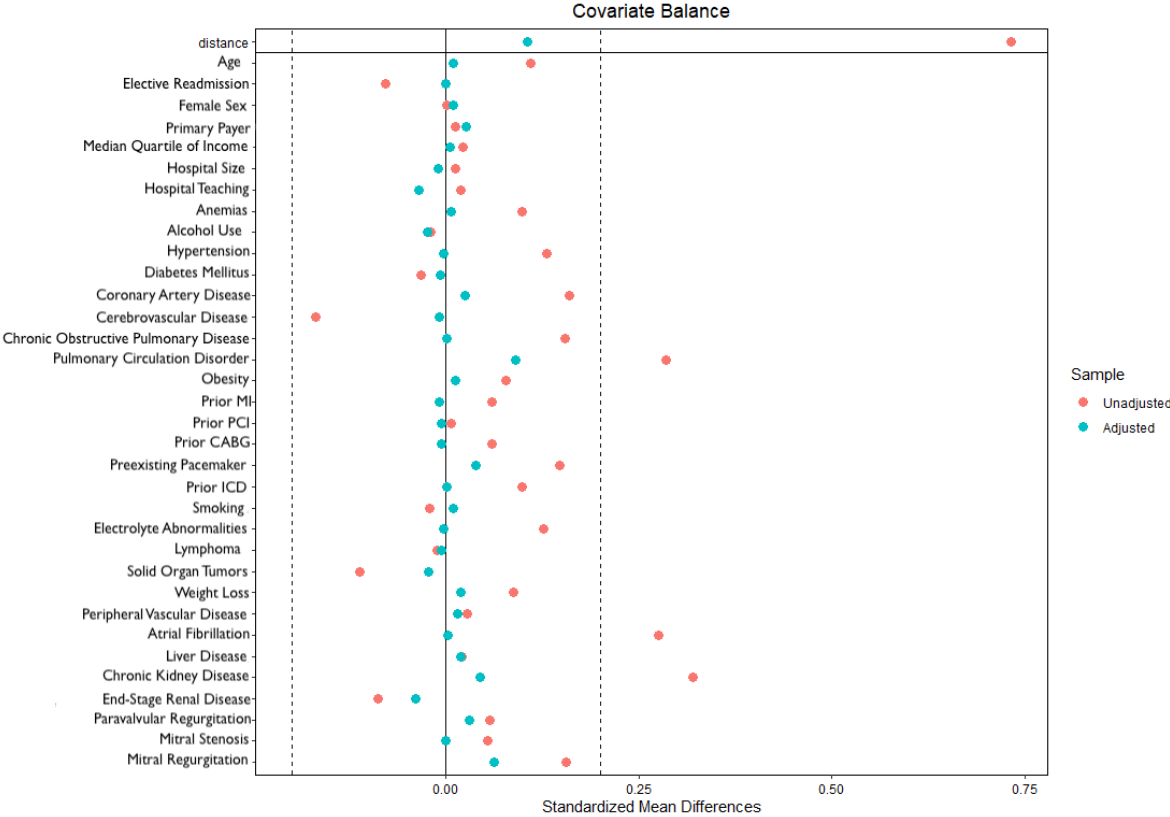

Abbreviations: MI=Myocardial Infarction, PCI=Percutaneous coronary intervention, CABG=Coronary artery bypass graft surgery, ICD=Implantable cardioverter defibrillator

**Figure S2. Cost of Readmission for HF readmissions compared with Non-Heart Failure Readmissions**

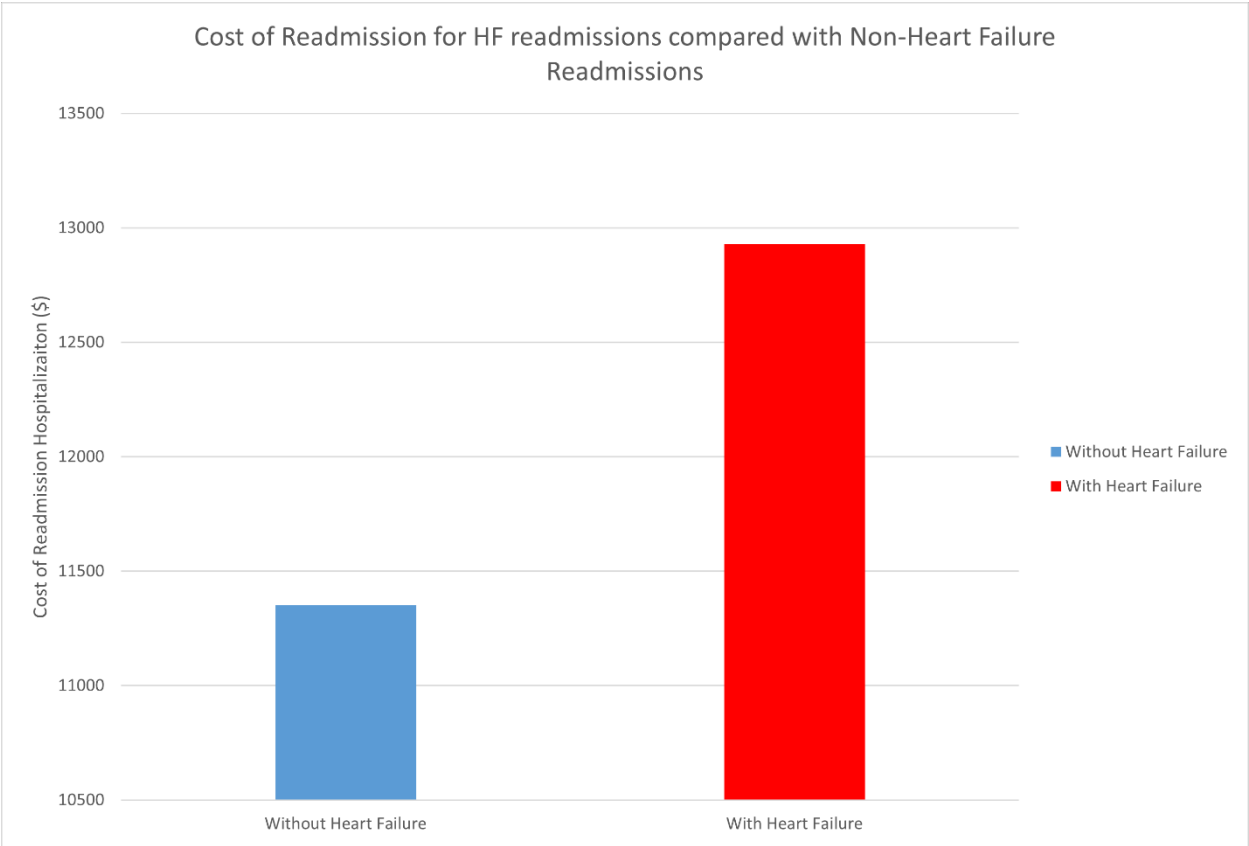

Abbreviations: HF=Heart Failure
